# Supplementary material
Source: ML conference proceedings conference paper supplement (https://openreview.net/forum?id=bBff294gqLp)
Supplement: supplementary_material [file attachment]

---

# Appendix for NAS-Bench-Graph: Benchmarking Graph Neural Architecture Search

---

Yijian Qin, Ziwei Zhang, Xin Wang\*, Zeyang Zhang, Wenwu Zhu\*

Department of Computer Science and Technology

Tsinghua University

Beijing, China 100084

qinyj19@mails.tsinghua.edu.cn, {zwzhang,xin\_wang}@tsinghua.edu.cn

zy-zhang20@mails.tsinghua.edu.cn, wwzhu@tsinghua.edu.cn

## 1 A Additional Experimental Details

2 In this section, we introduce additional experimental details including datasets description, hyper-  
3 parameters, and hardware and software configurations.

### 4 A.1 Datasets Description

5 The nine adopted datasets are described in details as follows:

- 6 • **Cora**, **Citeseer**, and **Pubmed** [13] are citation graphs where vertices represent papers and links  
7 represent citations between papers. Features are bag-of-words and labels are ground-truth topics.
- 8 • **Coauthor CS** and **Coauthor Physics** [14] are also co-authorship graphs from Microsoft Academic  
9 Graph [15]. Vertices represent authors, links represent co-author relationships, features represent  
10 paper keywords of the authors, and vertices labels indicate the research fields of the author.
- 11 • **Amazon Computers** and **Amazon Photo** [14] are subsets of co-purchase graph of Amazon [11].  
12 Vertices represent products, links between products represent that they are frequently bought  
13 together, features are bag-of-words of product reviews, and vertices labels are the product category.
- 14 • **ogbn-arXiv**, a part of the Open Graph Benchmark [8], is a graph representing the citation  
15 relationships between papers from arXiv Computer Science (CS) category indexed by MAG [15].  
16 Each paper has a feature vector based on word embedding in its title and abstract. Labels indicate  
17 subject areas of papers, and the dataset is split based the chronological order.
- 18 • **ogbn-proteins**, also a part of the Open Graph Benchmark [8], is a protein association graph,  
19 where vertices represent proteins and links represent different types of biological associations  
20 between proteins. The task is to predict the protein functions in a multi-label binary classification  
21 setup with data split based on different species the proteins come from.

22 The datasets are publicly available as follows.

- 23 • **Cora**, **Citeseer**, and **Pubmed**: <https://github.com/kimiyoung/planetoid> with MIT Li-  
24 cence.
- 25 • **Coauthor CS**, **Coauthor Physics**, **Amazon Computers**, and **Amazon Photo**: <https://github.com/shchur/gnn-benchmark/> with MIT Licence.  
26

---

\*Corresponding Authors.

- **ogbn-arXiv** and **ogbn-proteins**: <https://ogb.stanford.edu/docs/nodeprop/> with ODC-BY Licence for ogbn-arxiv and CC-0 License for ogbn-proteins.

## A.2 Hyper-parameters

The used hyper-parameters are shown in Table 3.

Table 3: The hyper-parameters and hardware used for each dataset. #Pre and #Post denotes the number of pre-process and post-process layers, respectively.

| Dataset          | #Pre | #Post | Dimension | Dropout | Optimizer | LR     | WD     | # Epoch |
|------------------|------|-------|-----------|---------|-----------|--------|--------|---------|
| Cora             | 0    | 1     | 256       | 0.7     | SGD       | 0.1    | 0.0005 | 400     |
| CiteSeer         | 0    | 1     | 256       | 0.7     | SGD       | 0.2    | 0.0005 | 400     |
| PubMed           | 0    | 0     | 128       | 0.3     | SGD       | 0.2    | 0.0005 | 500     |
| Coauthor-CS      | 1    | 0     | 128       | 0.6     | SGD       | 0.5    | 0.0005 | 400     |
| Coauthor-Physics | 1    | 1     | 256       | 0.4     | SGD       | 0.01   | 0      | 200     |
| Amazon-Photo     | 1    | 0     | 128       | 0.7     | Adam      | 0.0002 | 0.0005 | 500     |
| Amazon-Computers | 1    | 1     | 64        | 0.1     | Adam      | 0.005  | 0.0005 | 500     |
| ogbn-arxiv       | 0    | 1     | 128       | 0.2     | Adam      | 0.002  | 0      | 500     |
| ogbn-proteins    | 1    | 1     | 256       | 0       | Adam      | 0.01   | 0.0005 | 500     |

## A.3 Hardware and Software Configurations

- Operating System: Ubuntu 18.04.6 LTS for PubMed, ogbn-arXiv, and CentOS Linux release 7.6.1810 for the others.
- CPU: Intel(R) Xeon(R) Gold 6129 CPU @ 2.30GHz for PubMed, ogbn-arXiv, and Intel(R) Xeon(R) Gold 6240 CPU @ 2.60GHz for the others.
- GPU: NVIDIA GeForce RTX 3090 with 24GB of memories for PubMed, ogbn-arXiv, and NVIDIA Tesla V100 with 16GB of memories for the others.
- Software: Python 3.9.12, PyTorch 1.11.0+cu113, PyTorch-Geometric 2.0.4 [6].

## A.4 Training Time

Table 4: The average training time of architectures on each dataset.

| Dataset  | Time | Dataset          | Time  | Dataset          | Time  |
|----------|------|------------------|-------|------------------|-------|
| Cora     | 5.8s | Coauthor-CS      | 8.6s  | Amazon-Computers | 9.8s  |
| CiteSeer | 6.2s | Coauthor-Physics | 15.4s | ogbn-arXiv       | 71s   |
| PubMed   | 7.8s | Amazon-Photo     | 8.8s  | ogbn-proteins    | 50min |

We report the average training time of architectures on each dataset in Table 4. The total time cost of creating our benchmark is approximately 8,000 GPU hours.

## A.5 Size of the Search Space

In our proposed search space, we have nine candidate operations for four edges in the DAG, so there are  $9^4$  operation choices for each type of the macro space. Since we have nine types of macro spaces, we have  $9^4 * 9 = 59,049$  architectures in total. However, some of these architectures are isomorphic, e.g., an identity operation followed by GCN layer is equivalent to a GCN layer followed by an identity operation. We obtain 26,206 unique architectures after removing these duplicates.

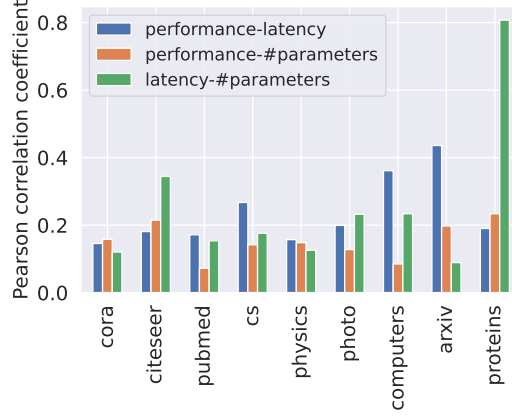

Figure 7: Pearson correlation coefficient between pairs among performance, latency, and the number of parameters.

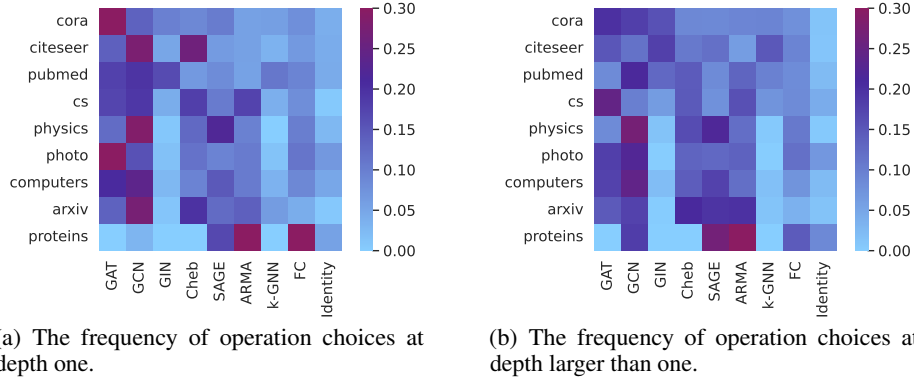

Figure 8: The frequency of operation choices at different depths in the top 5% architectures of different datasets.

## 48 B Additional Experimental Results

### 49 B.1 Correlations between Performance, Latency, and the Number of Parameters

50 We show the Pearson correlation coefficient between the performance, the latency, and the number  
 51 of parameters in Figure 7. We find that: 1) the number of parameters and the latency are positively  
 52 correlated in general. 2) Better performance in general also means a larger latency and more  
 53 parameters, which makes it necessary to balance the performance with the computational overhead.

### 54 B.2 The Operation Distribution of Different Depths

55 To further analyze the operation choices, we plot the frequency of operations with different depths,  
 56 i.e., the distance of the computation node to the input node. For example, if an operation receives the  
 57 raw input or the output of the pre-process layer, it is at the depth one; if an operation receives the  
 58 output of the above operation, it is at depth two, etc. We categorize the operations into two groups,  
 59 depth one and depth larger than one, and visualize the frequency of operation choices in Figure 8.

60 The results show that the distribution of operations at different depths shows different patterns on  
 61 different datasets. For example, for CiteSeer, GCN appears more frequently at depth one, but the  
 62 opposite for ogbn-proteins. The results indicate that searching for different operations at different  
 63 depths is critical and simply stacking the same operation cannot lead to the optimal results.

### 64 B.3 Transferability of the Optimal Architecture

65 To investigate the transferability of optimal architectures for different datasets, we calculate the rate at which an optimal architecture obtained on a search dataset outperforms other architectures on another evaluation dataset. The results are shown in Figure 9. We find that in some cases, the optimal architecture can transfer well, e.g., Citeseer to Cora and Physics to arXiv. Besides, the transferability can be asymmetric in some cases, e.g., the optimal architecture on Amazon-Computers performs well on Cora, CiteSeer, PubMed, and Coauthor-CS, but the optimal architectures on these four datasets cannot perform well on Amazon-Computers.

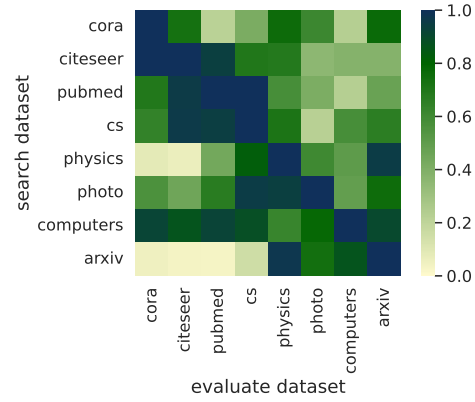

Figure 9: The rate at which the optimal architecture on the search dataset outperforms other architectures on the evaluation dataset.

## 78 C Example Usage & Reproducibility

### 79 C.1 Example Usage

80 All our codes and recorded metrics for the trained models are available at <https://github.com/THUMNLab/NAS-Bench-Graph>. Next, we provide some example usages.

82 At first, the benchmark of a certain dataset, e.g., Cora, can be read as:

```
83 from readbench import lightread
84 bench = lightread('cora')
```

85 The data is stored as a Python dictionary. To obtain the recorded metrics, an architecture needs to be specified by its macro space and operations. Since we constrain the DAG of the computation graph to have only one input node for each intermediate node, the macro space can be described by a list of integers, indicating the input node index for each computing node (0 for the raw input, 1 for the first computing node, etc.). Then, the operations can be specified by a list of strings with the same length. For example, to specify the architecture shown in Figure 10, we can use the following code:

```
91 from hpo import Arch
92 arch = Arch([0, 1, 2, 1], ['gcn', 'gin', 'fc', 'cheb'])
```

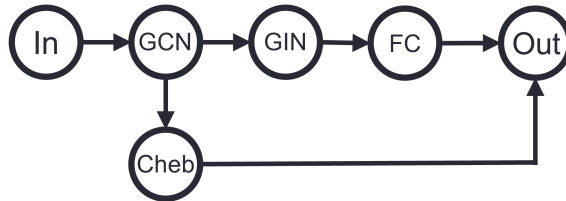

Figure 10: An example architecture.

93 Notice that we assume all leaf nodes (i.e., nodes without descendants) are connected to the output, so there is no need to specific the output node. Besides, the list can be specified in any order, e.g., the following code can specific the same architecture:

```
96 arch = Arch([0, 1, 1, 2], ['gcn', 'cheb', 'gin', 'fc'])
```

97 Then, four recorded metrics in the benchmark including the validation and test performance, the latency, and the number of parameters, can be obtained by a look-up table:

```
99 info = bench[arch.valid_hash()]
```

```

100 info['valid_perf'] # validation performance
101 info['perf']      # test performance
102 info['latency']   # latency
103 info['para']      # number of parameters

```

104 We provide the full data, including the training/validation/testing performance at each epoch  
105 at: <https://figshare.com/articles/dataset/NAS-bench-Graph/20070371>. Since we run  
106 each dataset with three random seeds, each dataset has 3 files. The full metric can be obtained  
107 similarly as follows:

```

108 from readbench import read
109 bench = read('cora0.bench') # dataset and seed
110 info = bench[arch.valid_hash()]
111 epoch = 50
112 info['dur'][epoch][0] # training performance
113 info['dur'][epoch][1] # validation performance
114 info['dur'][epoch][2] # testing performance
115 info['dur'][epoch][3] # training loss
116 info['dur'][epoch][4] # validation loss
117 info['dur'][epoch][5] # testing loss
118 info['dur'][epoch][6] # best performance

```

119 We have also provided the source codes of using our benchmark together with two public libraries for  
120 GraphNAS, AutoGL and NNI. See <https://github.com/THUMNLab/AutoGL/tree/agnn> and  
121 <https://github.com/THUMNLab/NAS-Bench-Graph/blob/main/runnni.py> for details.

## 122 C.2 Reproducibility

123 We have released the source code for our benchmark as well as the detailed hyper-parameters. We  
124 have also provided the full metrics of all the architectures in our search space, as discussed in  
125 Appendix C.1.

## 126 D Discussions

### 127 D.1 Preliminary on Graph NAS

128 Graphs are natural data structures to represent entities and their relationships, with real-world  
129 examples including social networks, e-commerce networks, biochemistry, etc. Graph neural networks  
130 (GNNs) are de facto standards in processing the ubiquitous graph data. Consider a graph  $\mathcal{G} = (\mathcal{V}, \mathcal{E})$ ,  
131 where  $\mathcal{V}$  denotes the vertex set and  $\mathcal{E} = \mathcal{V} \times \mathcal{V}$  denotes the link set. The neighborhood of a node  $v$  is  
132 denoted as  $\mathcal{N}(v)$ . The vertices are also associated with a feature matrix  $\mathbf{F}$ . Graph neural networks  
133 follow a neighborhood aggregation scheme. At each layer, the representations of nodes are generated  
134 through aggregating their neighborhood representations as follows:

$$\begin{aligned}
\mathbf{m}_i^{(l)} &= \text{AGGREGATE} \left( \left\{ \mathbf{h}_j^{(l)}, \forall j \in \mathcal{N}(i) \right\} \right) \\
\mathbf{h}_i^{(l+1)} &= \text{COMBINE} \left( \left[ \mathbf{m}_i^{(l)}, \mathbf{h}_i^{(l)} \right] \right),
\end{aligned} \tag{1}$$

135 where  $\mathbf{h}_i^{(l)}$  denotes the vertex representation of  $v_i$  in the  $l^{\text{th}}$  layer,  $\mathbf{m}_i^{(l)}$  is the message vector,  
136 and  $\text{AGGREGATE}(\cdot)$  and  $\text{COMBINE}(\cdot)$  are learnable functions. The vertex representations are  
137 initialized as vertex features, i.e.,  $\mathbf{h}_i^{(0)} = \mathbf{F}_{i,:}$ . After  $L$  message-passing layers, the representation  
138 of vertices  $\mathbf{H}^{(L)}$  can capture both structural and semantic information within the nodes'  $L$ -hop  
139 neighborhood. GNNs have achieved the state-of-the-art results for graph analytical tasks such as  
140 node classification, link prediction, and graph classification.

141 Graph neural architecture search aims to further automate the design of GNN architectures, e.g., the  
142 operations choices in the learnable functions  $\text{AGGREGATE}(\cdot)$  and  $\text{COMBINE}(\cdot)$ . The objective of

GraphNAS can be summarized as the following bi-level optimization problem:

$$\begin{aligned} & \min_{\alpha \in \mathcal{A}} \mathcal{L}_{val}(\mathbf{W}^*(\alpha), \alpha) \\ \text{s.t. } & \mathbf{W}^*(\alpha) = \arg \min_{\mathbf{W}} (\mathcal{L}_{train}(\mathbf{W}, \alpha)), \end{aligned} \quad (2)$$

where  $\alpha$  denotes the GNN architecture,  $\mathcal{A}$  is the search space,  $\mathbf{W}$  are learnable parameters for GNNs, and  $\mathcal{L}_{train}$  and  $\mathcal{L}_{val}$  denotes the training and validation loss, respectively. In short, the goal of GraphNAS is to find the best performing architecture in the search space so that the architecture can achieve the best validation performance after its parameters are trained in the training set.

## D.2 A Comparison with the existing NAS benchmarks

Table 5: A comparison with the existing NAS benchmarks

| Benchmark                 | Type      | Search Space | Data      | Datasets |
|---------------------------|-----------|--------------|-----------|----------|
| NAS-Bench-101 [17]        | Tabular   | 423k         | CV        | 1        |
| NAS-Bench-201 [4]         | Tabular   | 6k           | CV        | 3        |
| NAS-Bench-1shot1 [19]     | Tabular   | 364k         | CV        | 1        |
| NAS-Bench-ASR [12]        | Tabular   | 8k           | Acoustics | 1        |
| NAS-Bench-NLP [9]         | Tabular   | 14k          | NLP       | 2        |
| HW-NAS-Bench [10]         | Tabular   | 6k           | CV        | 3        |
| NATS-Bench [3]            | Tabular   | 32k          | CV        | 3        |
| NAs-HPO-Bench-II [7]      | Surrogate | 192k         | CV        | 1        |
| NAS-Bench-MR [2]          | Surrogate | $10^{23}$    | CV        | 4        |
| TransNAS-Bench [5]        | Tabular   | 7k           | CV        | 14       |
| NAS-Bench-111 [16]        | Surrogate | 423k         | CV        | 1        |
| NAS-Bench-311 [16]        | Surrogate | $10^{18}$    | CV        | 1        |
| NAS-Bench-Zero [1]        | Tabular   | 34k          | CV        | 3        |
| Surr-NAS-Bench-FBNet [20] | Surrogate | $10^{21}$    | CV        | 2        |
| NAS-Bench-Graph           | Tabular   | 26k          | Graph     | 9        |

We provide more comparisons of our proposed benchmark with the existing NAS benchmarks in Table 5. NAS benchmarks can be mainly divided into tabular benchmarks and surrogate benchmarks. In tabular benchmarks, all architectures in the search space are trained to get the empirical performance. On the other hand, surrogate benchmarks use surrogate functions to predict the performance of the architectures. Tabular benchmarks have better authenticity since the results are from experiments, but running experiments can cost lots of computational resources and potentially limits the size of the search space. Surrogate benchmarks are more efficient, but the quality of the benchmark depends highly on the surrogate function. Despite the efforts in creating NAS benchmarks for other domains, e.g., computer vision, NAS benchmark for graphs has not been studied in the literature.

## D.3 Comparison with GraphGym

GraphGym [18] is a pioneering work studying the design space of GNNs, which we have drawn inspirations in developing our benchmark. However, GraphGym is a public library and codebase for GNNs, which is different from our proposed benchmark in the following two aspects. First, GraphGym focuses on the search space and does not consider the search strategy of GNN architectures. Second and more importantly, we have trained and provided the performance of all possible architectures in our search space, consuming 8,000 GPU hours. Then, the evaluation of GraphNAS can be obtained by look-up tables for extremely efficient comparisons.

## E Broader Impact

GraphNAS can be widely applied to various domains such as social networks, recommendation systems, biological networks, the World Wide Web, etc. Our proposed benchmark can enable fair,

reproducible, and efficient comparisons of GraphNAS methods and therefore promotes further this research direction and benefits the above applications. As for ethical aspects, we do not foresee that our benchmark should produce any biased or offensive content. Besides, our proposed benchmark is based on existing publicly available graph datasets, which do not contain personally identifiable or privacy-related information, to the best of our knowledge.

## References

- [1] Hanlin Chen, Ming Lin, Xiuyu Sun, and Hao Li. Nas-bench-zero: A large scale dataset for understanding zero-shot neural architecture search. In *OpenReview*, 2021.
- [2] Mingyu Ding, Yuqi Huo, Haoyu Lu, Linjie Yang, Zhe Wang, Zhiwu Lu, Jingdong Wang, and Ping Luo. Learning versatile neural architectures by propagating network codes. *arXiv preprint arXiv:2103.13253*, 2021.
- [3] Xuanyi Dong, Lu Liu, Katarzyna Musial, and Bogdan Gabrys. Nats-bench: Benchmarking nas algorithms for architecture topology and size. *IEEE transactions on pattern analysis and machine intelligence*, 2021.
- [4] Xuanyi Dong and Yi Yang. Nas-bench-201: Extending the scope of reproducible neural architecture search. In *International Conference on Learning Representations*, 2019.
- [5] Yawen Duan, Xin Chen, Hang Xu, Zewei Chen, Xiaodan Liang, Tong Zhang, and Zhenguo Li. Transnas-bench-101: Improving transferability and generalizability of cross-task neural architecture search. In *Proceedings of the IEEE/CVF Conference on Computer Vision and Pattern Recognition*, pages 5251–5260, 2021.
- [6] Matthias Fey and Jan E. Lenssen. Fast graph representation learning with PyTorch Geometric. In *ICLR Workshop on Representation Learning on Graphs and Manifolds*, 2019.
- [7] Yoichi Hirose, Nozomu Yoshinari, and Shinichi Shirakawa. Nas-hpo-bench-ii: A benchmark dataset on joint optimization of convolutional neural network architecture and training hyperparameters. In *Asian Conference on Machine Learning*, pages 1349–1364. PMLR, 2021.
- [8] Weihua Hu, Matthias Fey, Marinka Zitnik, Yuxiao Dong, Hongyu Ren, Bowen Liu, Michele Catasta, and Jure Leskovec. Open graph benchmark: Datasets for machine learning on graphs. *Neural Information Processing Systems*, 2020.
- [9] Nikita Klyuchnikov, Ilya Trofimov, Ekaterina Artemova, Mikhail Salnikov, Maxim Fedorov, and Evgeny Burnaev. Nas-bench-nlp: neural architecture search benchmark for natural language processing. *arXiv preprint arXiv:2006.07116*, 2020.
- [10] Chaojian Li, Zhongzhi Yu, Yonggan Fu, Yonggan Zhang, Yang Zhao, Haoran You, Qixuan Yu, Yue Wang, Cong Hao, and Yingyan Lin. Hw-nas-bench: Hardware-aware neural architecture search benchmark. In *International Conference on Learning Representations*, 2020.
- [11] Julian McAuley, Christopher Targett, Qinfeng Shi, and Anton Van Den Hengel. Image-based recommendations on styles and substitutes. In *Proceedings of the 38th international ACM SIGIR conference on research and development in information retrieval*, pages 43–52, 2015.
- [12] Abhinav Mehrotra, Alberto Gil CP Ramos, Sourav Bhattacharya, Łukasz Dudziak, Ravichander Vipperla, Thomas Chau, Mohamed S Abdelfattah, Samin Ishtiaq, and Nicholas Donald Lane. Nas-bench-asr: Reproducible neural architecture search for speech recognition. In *International Conference on Learning Representations*, 2020.
- [13] Prithviraj Sen, Galileo Namata, Mustafa Bilgic, Lise Getoor, Brian Galligher, and Tina Eliassi-Rad. Collective classification in network data. *AI magazine*, 29(3):93–93, 2008.

- 212 [14] Oleksandr Shchur, Maximilian Mumme, Aleksandar Bojchevski, and Stephan Günnemann.  
213 Pitfalls of graph neural network evaluation. *Relational Representation Learning Workshop,*  
214 *NeurIPS 2018*, 2018.
- 215 [15] Kuansan Wang, Zhihong Shen, Chiyuan Huang, Chieh-Han Wu, Yuxiao Dong, and Anshul  
216 Kanakia. Microsoft academic graph: When experts are not enough. *Quantitative Science*  
217 *Studies*, 1(1):396–413, 2020.
- 218 [16] Shen Yan, Colin White, Yash Savani, and Frank Hutter. Nas-bench-x11 and the power of  
219 learning curves. *Advances in Neural Information Processing Systems*, 34, 2021.
- 220 [17] Chris Ying, Aaron Klein, Eric Christiansen, Esteban Real, Kevin Murphy, and Frank Hutter.  
221 Nas-bench-101: Towards reproducible neural architecture search. In *International Conference*  
222 *on Machine Learning*, pages 7105–7114. PMLR, 2019.
- 223 [18] Jiaxuan You, Zhitao Ying, and Jure Leskovec. Design space for graph neural networks. *Advances*  
224 *in Neural Information Processing Systems*, 33, 2020.
- 225 [19] Arber Zela, Julien Siems, and Frank Hutter. Nas-bench-1shot1: Benchmarking and dissecting  
226 one-shot neural architecture search. In *International Conference on Learning Representations*,  
227 2019.
- 228 [20] Arber Zela, Julien Niklas Siems, Lucas Zimmer, Jovita Lukasik, Margret Keuper, and Frank  
229 Hutter. Surrogate nas benchmarks: Going beyond the limited search spaces of tabular nas  
230 benchmarks. In *International Conference on Learning Representations*, 2021.
